# Supplementary material for: Lambda CI Binding to Related Phage Operator Sequences Validates Alignment Algorithm and Highlights the Importance of Overlooked Bonds
Source: MDPI journal article supplement (doi:10.3390/genes14122221), 2023-12-15
Supplement: s1 [file s1]

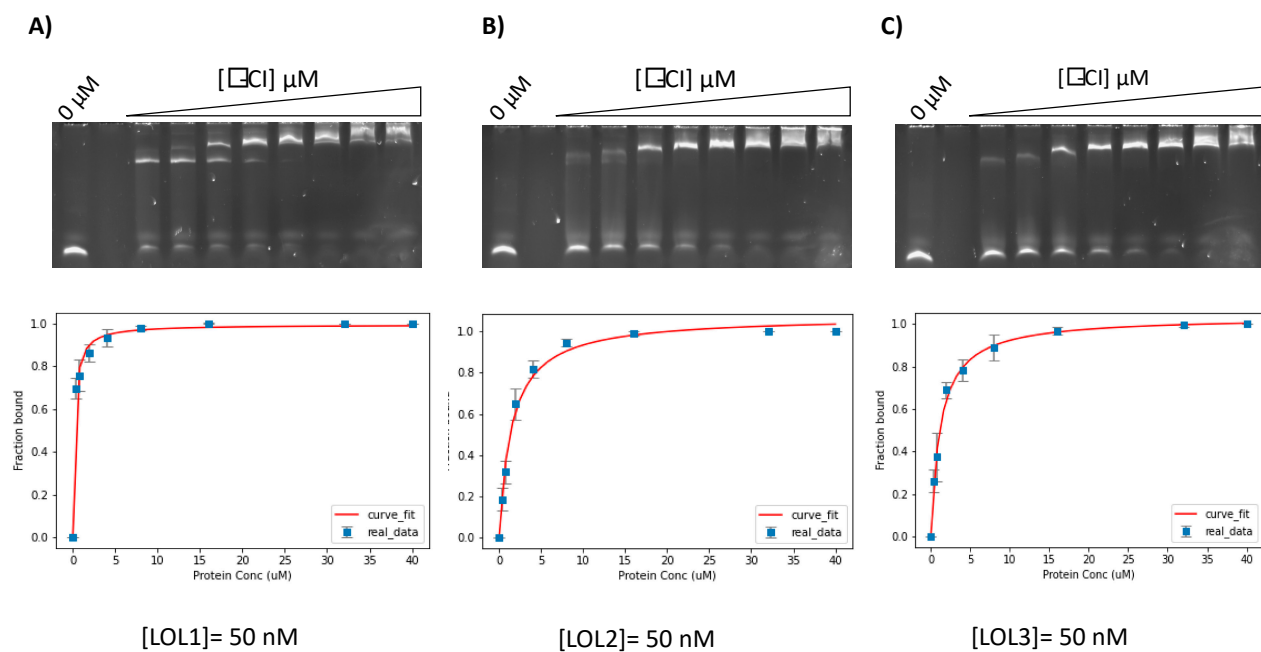

Figure S1. EMSAs gels for  $\lambda$ -CI with A) 50 nM LOL1, B) 50 nM LOL2 and C) 50 nM LOL3. All the binding data were measured using ImageJ and curve fitted using python.

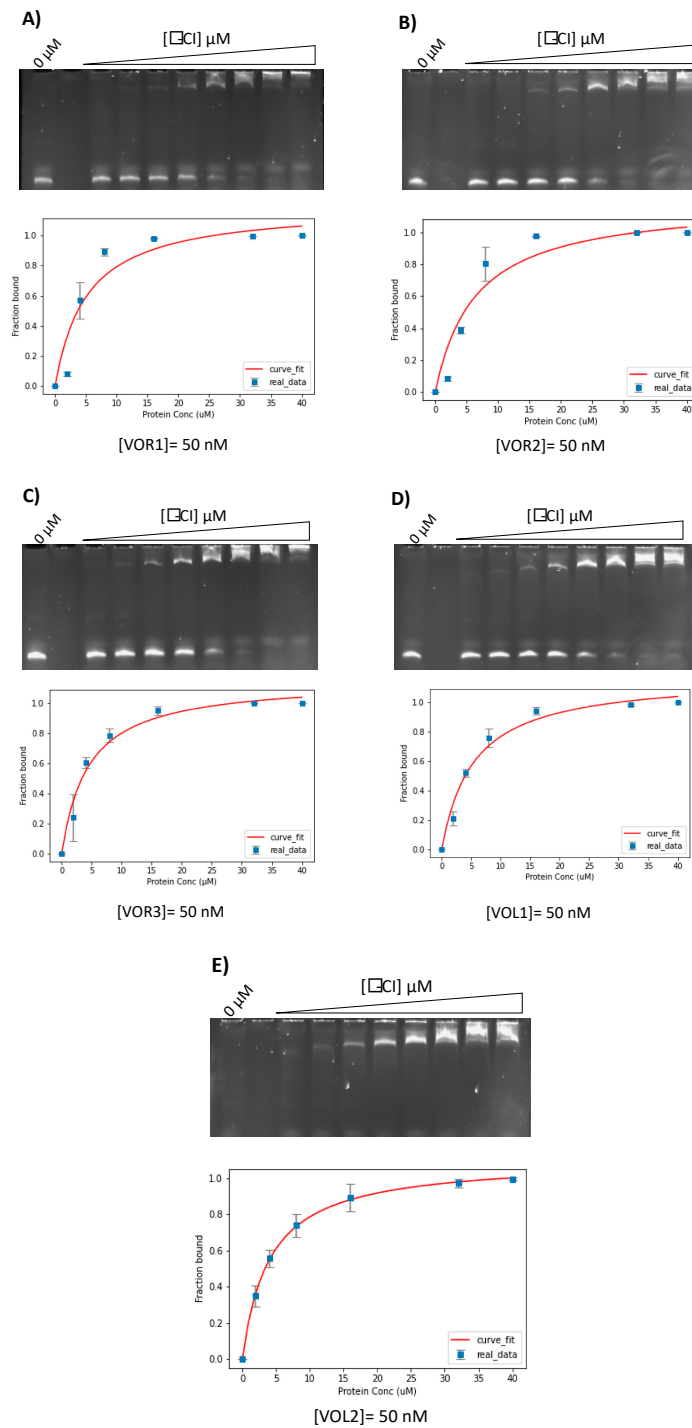

Figure S2. EMSAs gels for  $\lambda$ -Cl with A) 50 nM VOR1, B) 50 nM VOR2, C) 50 nM VOR3, D) 50 nM VOL1 and E) 50 nM VOL2. All the binding data were measured using ImageJ and curve fitted using python.

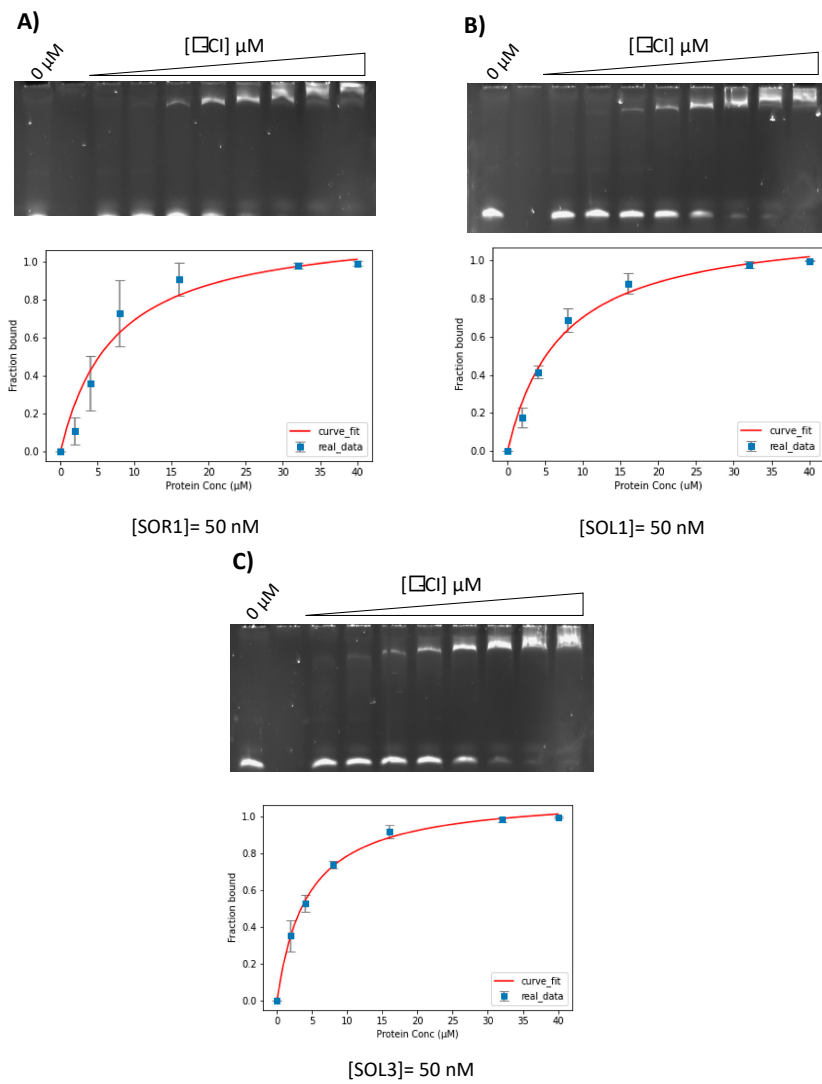

Figure S3. EMSAs gels for  $\lambda\text{-Cl}$  with A) 50 nM SOR1, B) 50 nM SOL1 and C) 50 nM SOL2. All the binding data were measured using ImageJ and curve fitted using python.

Table S1. The DNA sequences of the three phages' binding sites in black. Overhang sequences are in green.

| Phage Strain         | Binding site | DNA Sequence                             |
|----------------------|--------------|------------------------------------------|
| Lambda ( $\lambda$ ) | OR1          | GGTTATTATGG TACCTCTGGCGGTGATA TGCAAGTGC  |
|                      | OR2          | GGTTATTATGG TAACACCGTGCGTGTTG TGCAAGTGC  |
|                      | OR3          | GGTTATTATGG TATCACCGCAAGGGATA TGCAAGTGC  |
|                      | OL1          | GGTTATTATGG TATCACCGCCAGTGGTA TGCAAGTGC  |
|                      | OL2          | GGTTATTATGG CAACACCGCCAGAGATA TGCAAGTGC  |
|                      | OL3          | GGTTATTATGG TATCACCGCAGATGGTT TGCAAGTGC  |
| VT2-SA               | OR1          | GGTTATTATGG AAGTACATATTGTATTT TGCAAGTGC  |
|                      | OR2          | GGTTATTATGG ATGCACAATGTGTATTT TGCAAGTGC  |
|                      | OR3          | GGTTATTATGG TATTACGCTCTGTACTG TGCAAGTGC  |
|                      | OL1          | GGTTATTATGG TAGTACGATATGTACTT TGCAAGTGC  |
|                      | OL2          | GGTTATTATGG CAATACAATTTGTTCTA TGCAAGTGC  |
|                      | OL3          | GGTTATTATGG TACAACGCTTTGTATTT TGCAAGTGC  |
| Stx2I                | OR1          | GGTTATTATGG TTTCAGTTCAACCATAA TGCAAGTGC  |
|                      | OR2          | GGTTATTATGG ATGAGTACGATACTAAA TGCAAGTGC  |
|                      | OR3          | GGTTATTATGG GGGCGAATTCTTTGCGC TGCAAGTGC  |
|                      | OL1          | GGTTATTATGG CAATGATGATTTTCATGC TGCAAGTGC |
|                      | OL2          | GGTTATTATGG TGTAATATTTTCTTACA TGCAAGTGC  |
|                      | OL3          | GGTTATTATGG GCTTCTTGAATAACAGC TGCAAGTGC  |

| Table S2. The binding data for $\lambda$ -CI with LOR1 |            |            |            |            |            |            |
|--------------------------------------------------------|------------|------------|------------|------------|------------|------------|
| CI conc<br>( $\mu$ M)                                  | trials     |            |            |            | average    | SD         |
|                                                        | 1          | 2          | 3          | 4          |            |            |
| 0                                                      | 0          | 0          | 0          | 0          | 0          | 0          |
| 0.4                                                    | 0.64215724 | 0.63714968 | 0.36051448 |            | 0.54660713 | 0.16118041 |
| 0.8                                                    | 0.81082533 | 0.80156855 | 0.62118743 | 0.51932969 | 0.68822775 | 0.14247487 |
| 2                                                      | 0.95705854 | 0.93095137 | 0.90621801 | 0.86012149 | 0.91358735 | 0.04124786 |
| 4                                                      | 0.97754402 | 0.9889962  | 0.96971053 | 0.96144871 | 0.97442487 | 0.01172829 |
| 8                                                      | 0.98305379 | 0.99586596 | 0.99014985 | 0.98752654 | 0.98914903 | 0.00535111 |
| 16                                                     | 0.99659658 | 1          | 0.99738435 | 0.99077755 | 0.99618962 | 0.00389027 |
| 32                                                     | 1          | 1          | 1          | 1          | 1          | 0          |
| 40                                                     | 1          | 1          | 1          | 1          | 1          | 0          |

| Table S3. The binding data for $\lambda$ -CI with LOR2 |            |            |            |            |            |            |            |            |
|--------------------------------------------------------|------------|------------|------------|------------|------------|------------|------------|------------|
| CI conc<br>( $\mu$ M)                                  | trials     |            |            |            |            |            | average    | SD         |
|                                                        | 1          | 2          | 3          | 4          | 5          | 6          |            |            |
| 0                                                      | 0          | 0          | 0          | 0          | 0          | 0          | 0          | 0          |
| 0.4                                                    | 0.10279775 | 0.08526245 | 0.14515904 | 0.12326493 | 0.13748501 | 0.11015927 | 0.11735474 | 0.02239122 |
| 0.8                                                    | 0.32027149 | 0.41100334 | 0.20627587 | 0.19479572 | 0.47697192 | 0.19163987 | 0.3001597  | 0.12300053 |
| 2                                                      | 0.73205124 | 0.73126619 | 0.56563037 | 0.71177839 | 0.65448723 | 0.67827907 | 0.67891541 | 0.06336345 |
| 4                                                      | 0.90328677 | 0.93873148 | 0.88492019 | 0.78289039 | 0.6949698  | 0.88846965 | 0.84887805 | 0.09158886 |
| 8                                                      | 0.9662105  | 0.99088871 | 0.94249541 | 0.9235707  | 0.98185285 | 0.97730478 | 0.96372049 | 0.02576873 |
| 16                                                     | 0.99545487 | 0.99892665 | 0.95906681 | 0.97708132 | 0.99000016 | 0.99346508 | 0.98566582 | 0.01504986 |
| 32                                                     | 1          | 1          | 1          | 1          | 1          | 1          | 1          | 0          |
| 40                                                     | 1          | 1          | 1          | 1          | 1          | 1          | 1          | 0          |

| Table S4. The binding data for $\lambda$ -CI with LOR3 |            |            |            |            |            |            |
|--------------------------------------------------------|------------|------------|------------|------------|------------|------------|
| CI conc<br>( $\mu$ M)                                  | trials     |            |            |            | average    | SD         |
|                                                        | 1          | 2          | 3          | 4          |            |            |
| 0                                                      | 0          | 0          | 0          | 0          | 0          | 0          |
| 0.4                                                    | 0.01074645 | 0.02371539 | 0.0429321  | 0.03378716 | 0.02779528 | 0.01381224 |
| 0.8                                                    | 0.08518358 | 0.06505735 | 0.083499   | 0.04957068 | 0.07082765 | 0.01685043 |
| 2                                                      | 0.37680368 | 0.30580252 | 0.31940157 | 0.35947863 | 0.3403716  | 0.03330234 |
| 4                                                      | 0.86521344 | 0.81709052 | 0.84190748 | 0.86737039 | 0.84789546 | 0.02355126 |
| 8                                                      | 0.99583305 | 0.96966002 | 0.97585521 | 0.97558424 | 0.97923313 | 0.01142988 |
| 16                                                     | 1          | 1          | 1          | 1          | 1          | 0          |
| 32                                                     | 1          | 1          | 1          | 1          | 1          | 0          |
| 40                                                     | 1          | 1          | 1          | 1          | 1          | 0          |

| Table S5. The binding data for $\lambda$ -CI with LOL1 |            |            |            |            |            |            |
|--------------------------------------------------------|------------|------------|------------|------------|------------|------------|
| CI conc<br>( $\mu$ M)                                  | trials     |            |            |            | average    | SD         |
|                                                        | 1          | 2          | 3          | 4          |            |            |
| 0                                                      | 0          | 0          | 0          | 0          | 0          | 0          |
| 0.4                                                    | 0.74275585 | 0.73421081 | 0.66133934 | 0.64591473 | 0.69605518 | 0.04951787 |
| 0.8                                                    | 0.81615543 | 0.8250863  | 0.68089326 | 0.70580733 | 0.75698558 | 0.07426985 |
| 2                                                      | 0.8781074  | 0.91176577 | 0.83248591 | 0.82143733 | 0.8609491  | 0.04182533 |
| 4                                                      | 0.97661281 | 0.93991034 | 0.88264283 | 0.92777798 | 0.93173599 | 0.03875802 |
| 8                                                      | 0.98323567 | 0.98496397 | 0.96620679 | 0.9741487  | 0.97713878 | 0.00869587 |
| 16                                                     | 1          | 1          | 1          | 0.99544462 | 0.99886115 | 0.00227769 |
| 32                                                     | 1          | 1          | 1          | 1          | 1          | 0          |
| 40                                                     | 1          | 1          | 1          | 1          | 1          | 0          |

| Table S6. The binding data for $\lambda$ -CI with LOL2 |            |            |            |            |            |            |
|--------------------------------------------------------|------------|------------|------------|------------|------------|------------|
| CI conc<br>( $\mu$ M)                                  | trials     |            |            |            | average    | SD         |
|                                                        | 1          | 2          | 3          | 4          |            |            |
| 0                                                      | 0          | 0          | 0          | 0          | 0          | 0          |
| 0.4                                                    | 0.23799133 | 0.22091393 | 0.16967566 | 0.11503125 | 0.18590304 | 0.05545295 |
| 0.8                                                    | 0.33608317 | 0.33083302 | 0.3667847  | 0.24084449 | 0.31863635 | 0.05423095 |
| 2                                                      | 0.57557648 | 0.69539164 | 0.58713738 | 0.7317327  | 0.64745955 | 0.07790034 |
| 4                                                      | 0.76388376 | 0.8240741  | 0.86713628 | 0.81002573 | 0.81627997 | 0.04255033 |
| 8                                                      | 0.9615783  | 0.92528135 | 0.93196017 | 0.96090744 | 0.94493182 | 0.01903269 |
| 16                                                     | 0.99231078 | 0.9777523  | 0.98439195 | 1          | 0.98861376 | 0.00964554 |
| 32                                                     | 1          | 1          | 1          | 1          | 1          | 0          |
| 40                                                     | 1          | 1          | 1          | 1          | 1          | 0          |

| Table S7. The binding data for $\lambda$ -CI with LOL3 |            |            |            |            |            |            |
|--------------------------------------------------------|------------|------------|------------|------------|------------|------------|
| CI conc<br>( $\mu$ M)                                  | trials     |            |            |            | average    | SD         |
|                                                        | 1          | 2          | 3          | 4          |            |            |
| 0                                                      | 0          | 0          | 0          | 0          | 0          | 0          |
| 0.4                                                    | 0.30476998 | 0.30763117 | 0.19783118 | 0.23669997 | 0.26173307 | 0.05375537 |
| 0.8                                                    | 0.41190544 | 0.43094454 | 0.20352838 | 0.45163638 | 0.37450368 | 0.11513249 |
| 2                                                      | 0.64275015 | 0.72500806 | 0.67464069 | 0.71664094 | 0.68975996 | 0.03831244 |
| 4                                                      | 0.76551701 | 0.74636287 | 0.7682345  | 0.86030706 | 0.78510536 | 0.05107056 |
| 8                                                      | 0.8120679  | 0.87721704 | 0.94002501 | 0.93063476 | 0.88998618 | 0.05885151 |
| 16                                                     | 0.94658288 | 0.96583899 | 0.98879278 | 0.97235494 | 0.9683924  | 0.0174552  |
| 32                                                     | 1          | 0.98430365 | 1          | 1          | 0.99607591 | 0.00784817 |
| 40                                                     | 1          | 1          | 1          | 1          | 1          | 0          |

| Table S8. The binding data for $\lambda$ -CI with VOR1 |            |            |            |            |            |            |
|--------------------------------------------------------|------------|------------|------------|------------|------------|------------|
| CI conc<br>( $\mu$ M)                                  | trials     |            |            |            | average    | SD         |
|                                                        | 1          | 2          | 3          | 4          |            |            |
| 0                                                      | 0          | 0          | 0          | 0          | 0          | 0          |
| 0.4                                                    | 0.01402669 | 0.01181229 | 0.00889833 | 0.01088209 | 0.01140485 | 0.00212885 |
| 0.8                                                    | 0.02997044 | 0.03306916 | 0.03822149 | 0.02695978 | 0.03205522 | 0.00480835 |
| 2                                                      | 0.07618689 | 0.09965214 | 0.06991182 | 0.07678799 | 0.08063471 | 0.01305403 |
| 4                                                      | 0.53991689 | 0.4101596  | 0.67461383 | 0.64890473 | 0.56839876 | 0.12057322 |
| 8                                                      | 0.92098892 | 0.86184614 | 0.89215216 | 0.89052237 | 0.8913774  | 0.02415415 |
| 16                                                     | 0.97992512 | 0.98719576 | 0.98117429 | 0.97780621 | 0.98152534 | 0.0040278  |
| 32                                                     | 0.99667168 | 0.99487729 | 0.99319429 | 0.996975   | 0.99542956 | 0.0017543  |
| 40                                                     | 1          | 1          | 1          | 1          | 1          | 0          |

| Table S9. The binding data for $\lambda$ -CI with VOR2 |            |            |            |            |            |            |
|--------------------------------------------------------|------------|------------|------------|------------|------------|------------|
| CI conc<br>( $\mu$ M)                                  | trials     |            |            |            | average    | SD         |
|                                                        | 1          | 2          | 3          | 4          |            |            |
| 0                                                      | 0          | 0          | 0          | 0          | 0          | 0          |
| 0.4                                                    | 0          | 0          | 0          | 0          | 0          | 0          |
| 0.8                                                    | 0.02057431 | 0.02229398 | 0.01539598 | 0.00478789 | 0.01576304 | 0.00788226 |
| 2                                                      | 0.08824867 | 0.06646483 | 0.09858852 | 0.0820022  | 0.08382606 | 0.01344406 |
| 4                                                      | 0.41114593 | 0.36050232 | 0.39504381 | 0.37904633 | 0.3864346  | 0.02169361 |
| 8                                                      | 0.64663339 | 0.87280696 | 0.85236506 | 0.85185881 | 0.80591605 | 0.10663584 |
| 16                                                     | 0.97295743 | 0.96887687 | 0.98230809 | 0.97825865 | 0.97560026 | 0.00589493 |
| 32                                                     |            | 0.99704761 | 0.99495211 | 0.97481748 | 0.98893907 | 0.01227445 |
| 40                                                     |            | 1          | 1          | 0.98318958 | 0.99439653 | 0.0097055  |



| Table S10. The binding data for $\lambda$ -CI with VOR3 |            |            |            |            |            |            |
|---------------------------------------------------------|------------|------------|------------|------------|------------|------------|
| CI conc<br>( $\mu$ M)                                   | trials     |            |            |            | average    | SD         |
|                                                         | 1          | 2          | 3          | 4          |            |            |
| 0                                                       | 0          | 0          | 0          | 0          | 0          | 0          |
| 0.4                                                     | 0          | 0          | 0          | 0          | 0          | 0          |
| 0.8                                                     | 0.04886266 | 0.02413568 | 0.04429557 | 0.04827195 | 0.04139147 | 0.01168126 |
| 2                                                       | 0.11815051 | 0.11920422 | 0.44086945 | 0.28888996 | 0.24177853 | 0.15509678 |
| 4                                                       | 0.55060737 | 0.6220591  | 0.62070109 | 0.63122297 | 0.60614763 | 0.03732055 |
| 8                                                       | 0.74041737 | 0.77285962 | 0.84720425 | 0.7840791  | 0.78614008 | 0.04472143 |
| 16                                                      | 0.96392937 | 0.91393197 | 0.97830775 | 0.96667963 | 0.95571218 | 0.02854209 |
| 32                                                      | 0.95861666 | 0.95324985 | 0.99652787 | 0.99295673 | 0.97533778 | 0.02256043 |
| 40                                                      |            | 1          | 1          | 1          | 1          | 0          |

| Table S11. The binding data for $\lambda$ -CI with VOL1 |            |            |            |            |            |            |
|---------------------------------------------------------|------------|------------|------------|------------|------------|------------|
| CI conc<br>( $\mu$ M)                                   | trials     |            |            |            | average    | SD         |
|                                                         | 1          | 2          | 3          | 4          |            |            |
| 0                                                       | 0          | 0          | 0          | 0          | 0          | 0          |
| 0.4                                                     | 0.03057005 | 0.05819495 | 0.02850897 | 0.02397533 | 0.03531232 | 0.01550179 |
| 0.8                                                     | 0.07160596 | 0.10721945 | 0.09607109 | 0.07593393 | 0.08770761 | 0.01681807 |
| 2                                                       | 0.17766816 | 0.26756022 | 0.22409557 | 0.17032692 | 0.20991272 | 0.04520743 |
| 4                                                       | 0.48212511 | 0.51637814 | 0.53282156 | 0.54807347 | 0.51984957 | 0.02828455 |
| 8                                                       | 0.70521508 | 0.8244549  | 0.70404005 | 0.80055965 | 0.75856742 | 0.06304552 |
| 16                                                      | 0.94163359 | 0.97338456 | 0.8784265  | 0.93045004 | 0.93097367 | 0.03947065 |
| 32                                                      | 0.98056496 | 0.98508735 | 0.97074512 | 0.98298215 | 0.9798449  | 0.00634166 |
| 40                                                      |            | 1          | 0.98956712 | 0.98955347 | 0.9930402  | 0.00602737 |

| Table S12. The binding data for $\lambda$ -CI with VOL2 |            |            |            |            |            |            |
|---------------------------------------------------------|------------|------------|------------|------------|------------|------------|
| CI conc<br>( $\mu$ M)                                   | trials     |            |            |            | average    | SD         |
|                                                         | 1          | 2          | 3          | 4          |            |            |
| 0                                                       | 0          | 0          | 0          | 0          | 0          | 0          |
| 0.4                                                     | 0.08000414 | 0.08056843 | 0.11537065 | 0.06226504 | 0.08455207 | 0.02223398 |
| 0.8                                                     | 0.14845294 | 0.11181472 | 0.14178042 | 0.09284196 | 0.12372251 | 0.02603258 |
| 2                                                       | 0.40916511 | 0.26656848 | 0.36058305 | 0.35906424 | 0.34884522 | 0.05958231 |
| 4                                                       | 0.52267241 | 0.51340244 | 0.61217308 | 0.58201066 | 0.55756465 | 0.04742523 |
| 8                                                       | 0.66298645 | 0.71520899 | 0.81242318 | 0.76559397 | 0.73905315 | 0.06440047 |
| 16                                                      | 0.83293489 | 0.82922647 | 0.93710878 | 0.97912333 | 0.89459837 | 0.07533807 |
| 32                                                      | 0.94858903 | 0.95762087 | 0.9848738  | 1          | 0.97277093 | 0.02382009 |
| 40                                                      |            | 0.98826482 |            | 1          | 0.99413241 | 0.00829802 |

| Table S13. The binding data for $\lambda$ -CI with VOL3 |            |            |            |            |            |            |
|---------------------------------------------------------|------------|------------|------------|------------|------------|------------|
| CI conc<br>( $\mu$ M)                                   | trials     |            |            |            | average    | SD         |
|                                                         | 1          | 2          | 3          | 4          |            |            |
| 0                                                       | 0          | 0          | 0          | 0          | 0          | 0          |
| 0.4                                                     | 0.11351357 | 0.11800529 | 0.09511538 | 0.03921621 | 0.09146261 | 0.03621136 |
| 0.8                                                     | 0.1928493  | 0.22432755 | 0.22305369 | 0.17858345 | 0.2047035  | 0.02269076 |
| 2                                                       | 0.40941596 | 0.41946489 | 0.37259066 | 0.3713141  | 0.3931964  | 0.02487662 |
| 4                                                       | 0.5644268  | 0.55823846 | 0.56719082 | 0.54784369 | 0.55942494 | 0.00858022 |
| 8                                                       | 0.6946271  | 0.75325841 | 0.72598929 | 0.75732082 | 0.73279891 | 0.02900214 |
| 16                                                      | 0.88021251 | 0.88280774 | 0.84857208 | 0.88110808 | 0.8731751  | 0.01643729 |
| 32                                                      | 1          | 0.9538181  | 0.97302409 | 0.98232416 | 0.97729159 | 0.01923725 |
| 40                                                      | 1          | 0.97942233 | 1          | 0.98440898 | 0.99095783 | 0.01063762 |

| Table S14. The binding data for $\lambda$ -CI with SOR1 |            |            |            |            |            |            |
|---------------------------------------------------------|------------|------------|------------|------------|------------|------------|
| CI conc<br>( $\mu$ M)                                   | trials     |            |            |            | average    | SD         |
|                                                         | 1          | 2          | 3          | 4          |            |            |
| 0                                                       | 0          | 0          | 0          | 0          | 0          | 0          |
| 0.4                                                     | 0          | 0          | 0          | 0.01947984 | 0.00486996 | 0.00973992 |
| 0.8                                                     | 0.01304342 | 0.04837218 | 0.0538849  | 0.0574276  | 0.04318203 | 0.02043495 |
| 2                                                       | 0.0402713  | 0.08397515 | 0.20851674 | 0.10078474 | 0.10838698 | 0.07145965 |
| 4                                                       | 0.3027054  | 0.19663327 | 0.52325953 | 0.41840329 | 0.36025038 | 0.14146345 |
| 8                                                       | 0.5000063  | 0.68899767 | 0.89545658 | 0.82701548 | 0.72786901 | 0.17449739 |
| 16                                                      | 0.82689133 | 0.83896227 | 0.98386784 | 0.98746369 | 0.90929628 | 0.08833367 |
| 32                                                      | 0.9617668  | 0.97551262 | 0.99444645 | 0.99496582 | 0.98167292 | 0.01606307 |
| 40                                                      | 0.9779765  | 1          | 1          | 1          | 0.99449412 | 0.01101175 |

| Table S15. The binding data for $\lambda$ -CI with SOR2 |            |            |            |            |            |            |
|---------------------------------------------------------|------------|------------|------------|------------|------------|------------|
| CI conc<br>( $\mu$ M)                                   | trials     |            |            |            | average    | SD         |
|                                                         | 1          | 2          | 3          | 4          |            |            |
| 0                                                       | 0          | 0          | 0          | 0          | 0          | 0          |
| 0.4                                                     | 0          | 0          | 0          | 0          | 0          | 0          |
| 0.8                                                     | 0.00592222 | 0.02254033 | 0          | 0          | 0.00711564 | 0.01065536 |
| 2                                                       | 0.07986793 | 0.11951658 | 0.05727472 | 0.16368442 | 0.10508591 | 0.04677565 |
| 4                                                       | 0.26374299 | 0.38601725 | 0.40590062 | 0.22666082 | 0.32058042 | 0.08871847 |
| 8                                                       | 0.46515866 | 0.75354023 | 0.76322201 | 0.74266345 | 0.68114609 | 0.14423629 |
| 16                                                      | 0.90565095 | 0.92694548 | 0.93200518 | 0.92711663 | 0.92292956 | 0.01175552 |
| 32                                                      | 0.98106216 | 0.99225687 | 1          | 0.98680554 | 0.99003114 | 0.00806596 |
| 40                                                      | 1          | 1          | 1          | 0.9950606  | 0.99876515 | 0.0024697  |

| Table S16. The binding data for $\lambda$ -CI with SOR3 |            |            |            |            |            |            |
|---------------------------------------------------------|------------|------------|------------|------------|------------|------------|
| CI conc<br>( $\mu$ M)                                   | trials     |            |            |            | average    | SD         |
|                                                         | 1          | 2          | 3          | 4          |            |            |
| 0                                                       | 0          | 0          | 0          | 0          | 0          | 0          |
| 0.4                                                     | 0          | 0          | 0          | 0          | 0          | 0          |
| 0.8                                                     | 0.0263119  | 0.0322789  | 0.02467223 | 0.02234692 | 0.02640249 | 0.00424193 |
| 2                                                       | 0.07515644 | 0.10437324 | 0.11292587 | 0.20621888 | 0.12466861 | 0.05672065 |
| 4                                                       | 0.25803062 | 0.22253041 | 0.28552586 | 0.26466536 | 0.25768806 | 0.02620308 |
| 8                                                       | 0.71389634 | 0.6372837  | 0.74045782 | 0.80179675 | 0.72335865 | 0.06817466 |
| 16                                                      | 0.95229108 | 0.94763626 | 0.87673028 | 0.91823087 | 0.92372212 | 0.03476808 |
| 32                                                      | 1          | 0.98218216 | 0.98313518 | 0.98713873 | 0.98811402 | 0.00820982 |
| 40                                                      | 1          | 1          | 1          | 1          | 1          | 0          |

| Table S17. The binding data for $\lambda$ -CI with SOL1 |            |            |            |            |            |            |
|---------------------------------------------------------|------------|------------|------------|------------|------------|------------|
| CI conc<br>( $\mu$ M)                                   | trials     |            |            |            | average    | SD         |
|                                                         | 1          | 2          | 3          | 4          |            |            |
| 0                                                       | 0          | 0          | 0          | 0          | 0          | 0          |
| 0.4                                                     | 0.01463321 | 0          | 0          | 0          | 0.0036583  | 0.0073166  |
| 0.8                                                     | 0.05317782 | 0.03911125 | 0.02728853 | 0.02268064 | 0.03556456 | 0.01362955 |
| 2                                                       | 0.1501219  | 0.20956129 | 0.22729639 | 0.11753331 | 0.17612823 | 0.05113917 |
| 4                                                       | 0.36805867 | 0.44948844 | 0.42042621 | 0.41620982 | 0.41354578 | 0.03374112 |
| 8                                                       | 0.66252366 | 0.61674738 | 0.76790415 | 0.69628315 | 0.68586459 | 0.06366847 |
| 16                                                      | 0.86342997 | 0.81569019 | 0.88523374 | 0.94945947 | 0.87845334 | 0.05553605 |
| 32                                                      | 1          | 0.95291522 | 0.97682745 | 0.97735973 | 0.9767756  | 0.01922702 |
| 40                                                      | 1          | 1          | 0.99311855 | 0.99574557 | 0.99721603 | 0.00338883 |

| Table S18. The binding data for $\lambda$ -CI with SOL2 |            |            |            |            |            |            |
|---------------------------------------------------------|------------|------------|------------|------------|------------|------------|
| CI conc<br>( $\mu$ M)                                   | trials     |            |            |            | average    | SD         |
|                                                         | 1          | 2          | 3          | 4          |            |            |
| 0                                                       | 0          | 0          | 0          | 0          | 0          | 0          |
| 0.4                                                     | 0.0906104  | 0.03082151 | 0.05562639 | 0.02286552 | 0.04998096 | 0.03046831 |
| 0.8                                                     | 0.0891321  | 0.0933386  | 0.08992544 | 0.06878079 | 0.08529423 | 0.0111592  |
| 2                                                       | 0.39913809 | 0.22492358 | 0.4390636  | 0.33564389 | 0.34969229 | 0.09344644 |
| 4                                                       | 0.61427868 | 0.50909633 | 0.63514091 | 0.57753222 | 0.58401204 | 0.05533107 |
| 8                                                       | 0.86265941 | 0.72272238 | 0.83910715 | 0.83233576 | 0.81420618 | 0.06235848 |
| 16                                                      | 0.90159999 | 0.96373558 | 0.99163682 | 0.97925797 | 0.95905759 | 0.03996966 |
| 32                                                      | 0.98467916 | 0.99040399 | 1          | 0.99443241 | 0.99237889 | 0.00646747 |
| 40                                                      | 1          | 1          | 1          | 1          | 1          | 0          |

| Table S19. The binding data for $\lambda$ -CI with SOL3 |            |            |            |            |            |            |
|---------------------------------------------------------|------------|------------|------------|------------|------------|------------|
| CI conc<br>( $\mu$ M)                                   | trials     |            |            |            | average    | SD         |
|                                                         | 1          | 2          | 3          | 4          |            |            |
| 0                                                       | 0          | 0          | 0          | 0          | 0          | 0          |
| 0.4                                                     | 0.12759012 | 0.09792431 | 0.0715258  | 0.03365832 | 0.08267464 | 0.03990342 |
| 0.8                                                     | 0.20679682 | 0.13688742 | 0.11548178 |            | 0.15305534 | 0.04775626 |
| 2                                                       | 0.43725049 | 0.41679413 | 0.2863562  | 0.27681588 | 0.35430418 | 0.08447179 |
| 4                                                       | 0.54367471 | 0.58354003 | 0.47767705 | 0.50614501 | 0.5277592  | 0.04597173 |
| 8                                                       | 0.74873527 | 0.7451234  | 0.75414504 | 0.70663891 | 0.73866065 | 0.02166736 |
| 16                                                      | 0.87716312 | 0.95709068 | 0.92910767 | 0.91189007 | 0.91881289 | 0.03343551 |
| 32                                                      | 1          | 0.98414138 | 0.98647421 | 0.96934697 | 0.98499064 | 0.01255558 |
| 40                                                      | 1          | 0.98994859 | 0.9926234  | 1          | 0.995643   | 0.00514818 |
